# Supplementary material for: Unprecedented magnetic relaxation via the fourth excited state in low-coordinate lanthanide single-ion magnets: a theoretical perspective
Source: Royal Society of Chemistry journal article supplement (doi:10.1039/c4cc05522e), 2014-01-01
Supplement: c4cc05522e1.pdf [file c4cc05522e1.pdf]

## Supplementary Information

# Unprecedented Magnetic Relaxation via Fourth Excited State in Low-Coordinate Lanthanide Single-ion Magnets: A Theoretical Perspective

Saurabh Kumar Singh, Tulika Gupta, Maheswaran Shanmugam\* and Gopalan Rajaraman\*

*Received (in XXX, XXX) Xth XXXXXXXXXX 20XX, Accepted Xth XXXXXXXXXX 20XX*

DOI: 10.1039/b000000x

## Supplementary Information

### Computational Details:

Here we have performed all the *ab initio* calculations using MOLCAS 7.8<sup>1-3</sup> suite. We have employed [ANO-RCC<sup>4</sup>... 8s7p5d3f2g1h.] basis set for Er and Dy, [ANO-RCC...3s2p.] basis set for C, [ANO-RCC...2s.] basis set for H, [Si.ANO-RCC...4s3p1d.] basis set for Si, [ANO-RCC...3s2p1d.] basis set for N, and [ANO-RCC...3s2p1d.] basis set for O atoms. The ground state f- electron configuration for Er(III) is 4f<sup>11</sup> and this yields <sup>4</sup>I<sub>15/2</sub> as the multiplet ground state. First we have performed CASSCF<sup>5</sup> calculations with an active space of eleven active electrons in seven 4f orbitals (11,7). With this active space, we have computed 35 quartets as well 112 doublet states in the CI (Configuration Interaction) procedure. After computing these excited states, we have mixed all these 35 quartets and 112 doublets using RASSI-SO<sup>5</sup> module to compute the spin-orbit coupled states. For Dy(III) ion the f-electron configuration is 4f<sup>9</sup> which yields the <sup>6</sup>H<sub>15/2</sub> as the multiplet for the ground state. The CASSCF calculations have been performed with an active space of nine active electrons in seven 4f orbitals (9,7). Here we have computed only 21 roots as it found to be the robust towards computing the g-tensors for Dy(III) ions.<sup>6</sup> We have mixed these 21 roots in the RASSI-SO module to compute the spin-orbit coupled states. The computed SO states of Dy(III) and Er(III) have been taken into the SINGLE\_ANISO code to compute the g-tensors. In order check the effects of higher excited states (quartets and doublets) on the magnetic anisotropy and low-lying energy spectrum, we have also performed RASSI calculations by mixing 21 sextets, 108 quartets and 32 doublets which lie within an energy window of 40,000 cm<sup>-1</sup>. The obtained low-lying energy spectrum for Dy(III) complexes by mixing 21 sextets, 108 quartets and 32 doublets is similar to the pattern computed with 21 roots only. The Er(III) and Dy(III) ion has eight low-lying Kramers doublets for which the anisotropic g-tensors have been computed. The Cholesky decomposition for two electron integrals is employed throughout our calculations. Using SINGLE\_ANISO code we have also extracted the crystal field parameters as implemented in MOLCAS 7.8. The transition matrix elements are computed using a MOLCAS routine provided by Prof. L. Chibotaru, University of Leuven, Belgium. Mulliken charges and the spin densities have been computed using DFT calculations employing Gaussian 09<sup>7</sup> suite. Here we have employed the B3LYP<sup>8-11</sup> functional along with the Cundari-Stevens double  $\zeta$  polarization basis set<sup>12</sup> for the Er(III) and Dy(III) ions and the Ahlrichs triple  $\zeta$  basis set<sup>13</sup> has been employed for rest of the atoms.

## Supplementary Information

Table S1. CASSCF+RASSI computed spin-free and spin-orbit state energies for complex **1a**.

| Spin-free Energies for complex 1a |           | Spin-Orbit Energies for complex 1a |           |
|-----------------------------------|-----------|------------------------------------|-----------|
| 0.000                             | 43934.212 | 0                                  | 40675.988 |
| 1.905                             | 43934.890 | 101.38                             | 40707.580 |
| 114.498                           | 43945.027 | 189.099                            | 40794.364 |
| 115.913                           | 44035.637 | 266.348                            | 40820.240 |
| 199.407                           | 44038.468 | 331.057                            | 40922.260 |
| 201.449                           | 44095.317 | 439.920                            | 40957.915 |
| 255.025                           | 44102.786 | 500.341                            | 41132.594 |
| 362.956                           | 44116.938 | 539.265                            | 41238.031 |
| 418.668                           | 44457.552 | 6586.831                           | 41409.026 |
| 419.312                           | 44459.734 | 6690.044                           | 41475.452 |
| 507.985                           | 44932.169 | 6784.476                           | 41499.085 |
| 509.545                           | 44932.218 | 6867.725                           | 49828.104 |
| 549.466                           | 45318.425 | 6950.641                           | 49912.136 |
| 18159.747                         | 45318.610 | 7008.365                           | 49922.350 |
| 18198.349                         | 45606.118 | 7042.185                           | 49973.788 |
| 18202.896                         | 45624.927 | 10662.412                          | 50051.859 |
| 18325.613                         | 45824.530 | 10760.809                          | 50103.022 |
| 18331.274                         | 45826.674 | 10847.663                          | 50158.803 |
| 18408.861                         | 45945.021 | 10922.538                          | 50231.318 |
| 18697.368                         | 45956.089 | 10974.997                          | 50272.950 |
| 18771.690                         | 45992.109 | 11003.966                          | 50324.127 |
| 28654.535                         | 49986.204 | 13488.964                          | 50640.703 |
| 28654.633                         | 49986.458 | 13563.412                          | 50884.686 |
| 28689.993                         | 50150.383 | 13660.075                          | 50898.068 |
| 28852.159                         | 50150.879 | 13729.395                          | 51065.357 |
| 28859.638                         | 50230.820 | 13785.355                          | 51177.134 |
| 28907.634                         | 50271.184 | 18975.215                          | 51233.305 |
| 28910.753                         | 50323.347 | 19013.594                          | 51587.128 |
| 28913.309                         | 50323.664 | 19097.115                          | 51674.552 |
| 28960.402                         | 50375.691 | 19244.677                          | 51918.701 |
| 46169.495                         | 50379.700 | 19485.735                          | 52059.930 |
| 46174.529                         | 50404.166 | 22771.147                          | 52160.358 |
| 47382.562                         | 50892.302 | 22794.846                          | 52221.831 |
| 47394.820                         | 50894.843 | 22822.759                          | 52335.928 |
| 47686.310                         | 51773.978 | 22872.712                          | 52467.804 |
| 18061.192                         | 51777.837 | 22876.710                          | 52560.412 |
| 18069.382                         | 52075.369 | 22894.336                          | 52610.927 |
| 18070.137                         | 60479.116 | 23624.471                          | 54719.019 |
| 18100.844                         | 60509.007 | 23823.511                          | 54841.225 |
| 18101.063                         | 60796.765 | 25136.101                          | 55075.148 |
| 18145.316                         | 60798.514 | 25206.502                          | 55700.448 |
| 18156.351                         | 60904.547 | 25342.509                          | 56233.164 |
| 18209.670                         | 60905.390 | 25568.021                          | 56668.279 |
| 18209.705                         | 60924.950 | 27274.133                          | 57012.595 |
| 18271.385                         | 76646.242 | 27290.760                          | 57271.515 |
| 18271.484                         | 76646.379 | 27463.566                          | 57442.979 |
| 23773.668                         | 77020.401 | 27532.699                          | 57528.918 |
| 23825.368                         | 77078.507 | 27870.457                          | 58515.788 |
| 23828.031                         | 77356.030 | 27897.158                          | 58644.712 |
| 23970.734                         | 77357.719 | 27927.637                          | 58732.518 |
| 23971.185                         | 77537.362 | 27937.895                          | 58796.825 |

## Supplementary Information

---

|           |            |           |            |
|-----------|------------|-----------|------------|
| 24172.695 | 77542.530  | 27998.165 | 58839.750  |
| 24179.214 | 77598.205  | 28084.939 | 59422.762  |
| 24403.929 | 109235.713 | 31416.541 | 60616.872  |
| 24403.982 | 109339.012 | 31709.924 | 60740.154  |
| 26371.490 | 110577.403 | 31991.411 | 61018.494  |
| 26371.493 | 110578.961 | 32252.297 | 61209.661  |
| 26685.071 | 111276.989 | 32472.064 | 61260.175  |
| 26685.869 | 111292.378 | 32638.683 | 61344.420  |
| 26988.713 | 111515.614 | 32731.989 | 61434.758  |
| 26988.728 |            | 32759.719 | 61479.508  |
| 27262.236 |            | 32873.642 | 61666.139  |
| 27262.389 |            | 32894.293 | 66743.437  |
| 27480.954 |            | 32908.336 | 67086.756  |
| 27495.472 |            | 32997.946 | 67264.801  |
| 27652.931 |            | 33012.203 | 67357.264  |
| 27655.855 |            | 33024.843 | 67510.541  |
| 27752.001 |            | 33309.402 | 67696.305  |
| 27757.554 |            | 33343.453 | 75981.079  |
| 27788.243 |            | 33410.540 | 76241.663  |
| 32768.138 |            | 33481.771 | 76274.706  |
| 32768.200 |            | 34066.071 | 82823.157  |
| 32807.523 |            | 34096.640 | 83188.895  |
| 33018.963 |            | 34126.482 | 83426.402  |
| 33526.883 |            | 34132.366 | 83544.720  |
| 33527.785 |            | 34151.907 | 86607.980  |
| 33629.321 |            | 37041.866 | 87006.242  |
| 33630.269 |            | 37348.162 | 87320.493  |
| 43278.916 |            | 37636.767 | 87527.943  |
| 43278.931 |            | 37650.401 | 87631.056  |
| 43452.264 |            | 37897.803 | 115598.668 |
| 43452.568 |            | 38108.123 | 116854.966 |
| 43653.289 |            | 38153.110 | 117429.296 |
| 43653.487 |            | 38258.326 | 119778.307 |
| 43750.182 |            | 38324.838 | 120991.137 |
| 43750.374 |            | 40411.961 | 121709.418 |
| 43914.763 |            | 40652.445 | 122056.839 |

---

## Supplementary Information

Table S2. CASSCF+RASSI computed spin-free and spin-orbit state energies for complex **1b** using only 21 roots.

| Spin-free Energies for complex 1b | Spin-Orbit Energies for complex 1b |           |
|-----------------------------------|------------------------------------|-----------|
| 0.000                             | 0.000                              | 10048.448 |
| 51.105                            | 48.452                             | 10086.009 |
| 54.161                            | 147.431                            | 10090.452 |
| 232.774                           | 304.564                            | 10107.756 |
| 237.643                           | 519.201                            | 10530.901 |
| 559.677                           | 789.584                            | 10989.119 |
| 622.866                           | 1078.226                           | 11409.392 |
| 1036.934                          | 1337.275                           | 12004.392 |
| 1037.280                          | 3059.197                           | 12076.334 |
| 1421.912                          | 3118.493                           | 12111.839 |
| 1422.059                          | 3232.180                           | 12168.038 |
| 7812.108                          | 3398.639                           | 12222.906 |
| 7861.948                          | 3611.688                           | 12252.158 |
| 8130.437                          | 3872.587                           | 13899.548 |
| 8132.173                          | 4180.183                           | 13933.330 |
| 8200.328                          | 5706.077                           | 13949.958 |
| 8201.075                          | 5770.194                           | 14008.965 |
| 8223.877                          | 5891.241                           | 15314.142 |
| 34792.000                         | 6070.693                           | 15314.556 |
| 34794.505                         | 6311.950                           | 15376.386 |
| 36349.830                         | 6652.584                           | 16292.178 |
|                                   | 7924.971                           | 16367.192 |
|                                   | 7996.222                           | 16944.687 |
|                                   | 8146.109                           | 38678.513 |
|                                   | 8383.681                           | 38905.509 |
|                                   | 8764.167                           | 39129.468 |
|                                   | 9690.124                           | 39307.111 |
|                                   | 9758.116                           | 40107.145 |
|                                   | 9802.820                           | 40397.392 |
|                                   | 9906.016                           | 41393.792 |
|                                   | 9989.730                           | 41826.425 |
|                                   |                                    | 41939.140 |

## Supplementary Information

Table S3. CASSCF+RASSI computed spin-free and spin-orbit state energies for complex **2a**.

| Spin-free Energies for complex 2a |           | Spin-Orbit Energies for complex 2a |           |
|-----------------------------------|-----------|------------------------------------|-----------|
| 0.000                             | 43884.505 | 0.00                               |           |
| 29.900                            | 43932.433 | 76.317                             | 41375.891 |
| 61.884                            | 43943.655 | 114.850                            | 41968.725 |
| 156.041                           | 44037.356 | 200.849                            | 42057.135 |
| 168.708                           | 44041.065 | 249.748                            | 42162.475 |
| 231.473                           | 44108.594 | 260.975                            | 49361.567 |
| 296.579                           | 44109.265 | 318.083                            | 49361.567 |
| 314.059                           | 44391.593 | 372.556                            | 49592.538 |
| 341.216                           | 44391.745 | 6609.598                           | 49711.833 |
| 358.402                           | 44538.033 | 6673.879                           | 49858.925 |
| 376.693                           | 44538.893 | 6715.070                           | 49913.185 |
| 428.815                           | 44651.745 | 6766.662                           | 49934.813 |
| 454.956                           | 44654.436 | 6792.336                           | 49982.172 |
| 18192.877                         | 44752.449 | 6808.530                           | 50029.384 |
| 18220.323                         | 44767.757 | 6866.879                           | 50051.678 |
| 18303.044                         | 44840.018 | 10666.862                          | 50088.286 |
| 18377.293                         | 44889.546 | 10719.903                          | 50119.420 |
| 18400.803                         | 44922.881 | 10757.544                          | 50139.564 |
| 18448.827                         | 45042.095 | 10784.907                          | 50220.701 |
| 18531.731                         | 45050.200 | 10796.477                          | 50307.830 |
| 18547.141                         | 45241.502 | 10844.067                          | 50431.113 |
| 28547.012                         | 45242.456 | 13407.675                          | 50586.284 |
| 28609.873                         | 45454.859 | 13515.391                          | 50766.930 |
| 28647.735                         | 45454.923 | 13562.783                          | 50951.211 |
| 28683.660                         | 50049.980 | 13608.609                          | 51299.516 |
| 28735.206                         | 50064.446 | 13642.926                          | 51442.757 |
| 28804.362                         | 50080.856 | 18960.953                          | 51630.817 |
| 28837.752                         | 50089.068 | 19036.375                          | 51832.687 |
| 28943.106                         | 50124.986 | 19101.209                          | 51847.879 |
| 28961.733                         | 50147.800 | 19155.537                          | 51856.413 |
| 46505.496                         | 50196.011 | 19192.191                          | 51902.457 |
| 46694.959                         | 50233.586 | 22652.409                          | 52016.421 |
| 46848.277                         | 50241.881 | 22692.582                          | 52103.570 |
| 47096.429                         | 50261.081 | 22709.912                          | 52174.766 |
| 47288.990                         | 50271.767 | 22739.569                          | 52223.574 |
| 18041.694                         | 51225.129 | 22761.608                          | 54599.670 |
| 18045.406                         | 51270.033 | 22777.435                          | 54668.384 |
| 18090.025                         | 51427.447 | 23594.616                          | 56020.004 |
| 18100.422                         | 51644.886 | 23673.584                          | 56178.563 |
| 18118.899                         | 51661.067 | 25135.882                          | 56297.026 |
| 18119.288                         | 60590.583 | 25199.508                          | 56397.338 |
| 18137.133                         | 60608.690 | 25276.497                          | 56507.087 |
| 18151.164                         | 60684.416 | 25335.695                          | 56661.819 |
| 18157.496                         | 60697.955 | 27252.937                          | 56858.190 |
| 18169.423                         | 60717.351 | 27270.059                          | 57073.699 |
| 18174.354                         | 60744.316 | 27345.128                          | 58502.220 |
| 23875.245                         | 60775.294 | 27556.105                          | 58519.397 |
| 23878.287                         | 76924.777 | 27676.807                          | 58574.585 |
| 23973.523                         | 76930.141 | 27793.677                          | 58634.676 |
| 23986.211                         | 77064.389 | 27821.320                          | 58665.145 |

## Supplementary Information

---

|           |            |           |            |
|-----------|------------|-----------|------------|
| 24013.276 | 77085.054  | 27869.703 | 59284.394  |
| 24035.223 | 77118.364  | 27920.093 | 60857.046  |
| 24073.973 | 77170.898  | 27952.331 | 60921.089  |
| 24147.268 | 77179.837  | 31815.913 | 60937.536  |
| 24152.937 | 77340.343  | 31979.870 | 61000.274  |
| 26837.008 | 77346.068  | 32042.706 | 61038.904  |
| 26837.418 | 110031.768 | 32117.056 | 61079.417  |
| 26998.649 | 110061.218 | 32204.144 | 61171.327  |
| 27007.185 | 110219.549 | 32239.583 | 61239.010  |
| 27058.145 | 110461.068 | 32369.909 | 61251.783  |
| 27089.627 | 110568.468 | 32514.542 | 66869.625  |
| 27123.833 | 110934.020 | 32704.716 | 67088.272  |
| 27197.187 | 110991.916 | 32753.724 | 67159.450  |
| 27206.554 |            | 32771.259 | 67206.145  |
| 27245.867 |            | 32844.636 | 67258.497  |
| 27249.432 |            | 32883.925 | 67311.168  |
| 27371.878 |            | 32911.574 | 75987.028  |
| 27372.122 |            | 33208.161 | 76040.151  |
| 27521.868 |            | 33255.923 | 76066.639  |
| 27521.981 |            | 33273.685 | 82946.685  |
| 32984.328 |            | 33305.795 | 83073.976  |
| 33004.060 |            | 33954.798 | 83131.620  |
| 33023.328 |            | 33962.456 | 83255.656  |
| 33086.476 |            | 33975.368 | 86868.337  |
| 33274.058 |            | 33984.254 | 86998.949  |
| 33331.703 |            | 34018.540 | 87068.012  |
| 33335.677 |            | 37372.917 | 87154.023  |
| 33364.461 |            | 37531.368 | 87313.511  |
| 43687.653 |            | 37593.416 | 116136.233 |
| 43696.879 |            | 40780.644 | 116439.472 |
| 43785.543 |            | 40827.251 | 116897.769 |
| 43793.697 |            | 40870.141 | 120550.096 |
| 43810.109 |            | 40983.091 | 120766.599 |
| 43820.832 |            | 41260.631 | 121102.996 |
|           |            | 41314.840 | 121507.797 |

---

## Supplementary Information

Table S4. CASSCF+RASSI computed spin-free and spin-orbit state energies for complex **2b** using only 21 roots.

| Spin-free Energies for complex 2b | Spin-Orbit Energies for complex 2b |           |
|-----------------------------------|------------------------------------|-----------|
| 0.000                             | 0.000                              | 9915.034  |
| 8.841                             | 199.256                            | 9936.955  |
| 314.200                           | 377.733                            | 9989.357  |
| 329.396                           | 409.488                            | 10094.943 |
| 431.170                           | 464.093                            | 11100.802 |
| 439.899                           | 525.757                            | 11301.260 |
| 537.975                           | 580.878                            | 11513.026 |
| 597.428                           | 790.922                            | 11959.006 |
| 614.620                           | 3101.076                           | 11993.435 |
| 821.128                           | 3247.539                           | 12029.829 |
| 821.558                           | 3339.292                           | 12053.357 |
| 7742.337                          | 3397.397                           | 12083.609 |
| 7772.427                          | 3441.781                           | 13731.994 |
| 7832.546                          | 3517.577                           | 13795.645 |
| 7882.830                          | 3657.355                           | 13827.832 |
| 7976.296                          | 5731.632                           | 13847.018 |
| 7999.589                          | 5852.500                           | 15148.125 |
| 8039.513                          | 5930.218                           | 15187.690 |
| 34704.105                         | 5990.658                           | 15215.007 |
| 35186.413                         | 6060.520                           | 16161.004 |
| 35485.750                         | 6165.112                           | 16189.541 |
|                                   | 7941.677                           | 16772.778 |
|                                   | 8044.854                           | 38834.218 |
|                                   | 8135.474                           | 38920.160 |
|                                   | 8211.540                           | 39018.914 |
|                                   | 8304.602                           | 39257.670 |
|                                   | 9712.727                           | 40250.615 |
|                                   | 9760.015                           | 40457.273 |
|                                   | 9778.190                           | 40691.358 |
|                                   | 9806.664                           | 41433.976 |
|                                   | 9835.138                           | 41520.823 |
|                                   | 9860.675                           |           |



## Supplementary Information

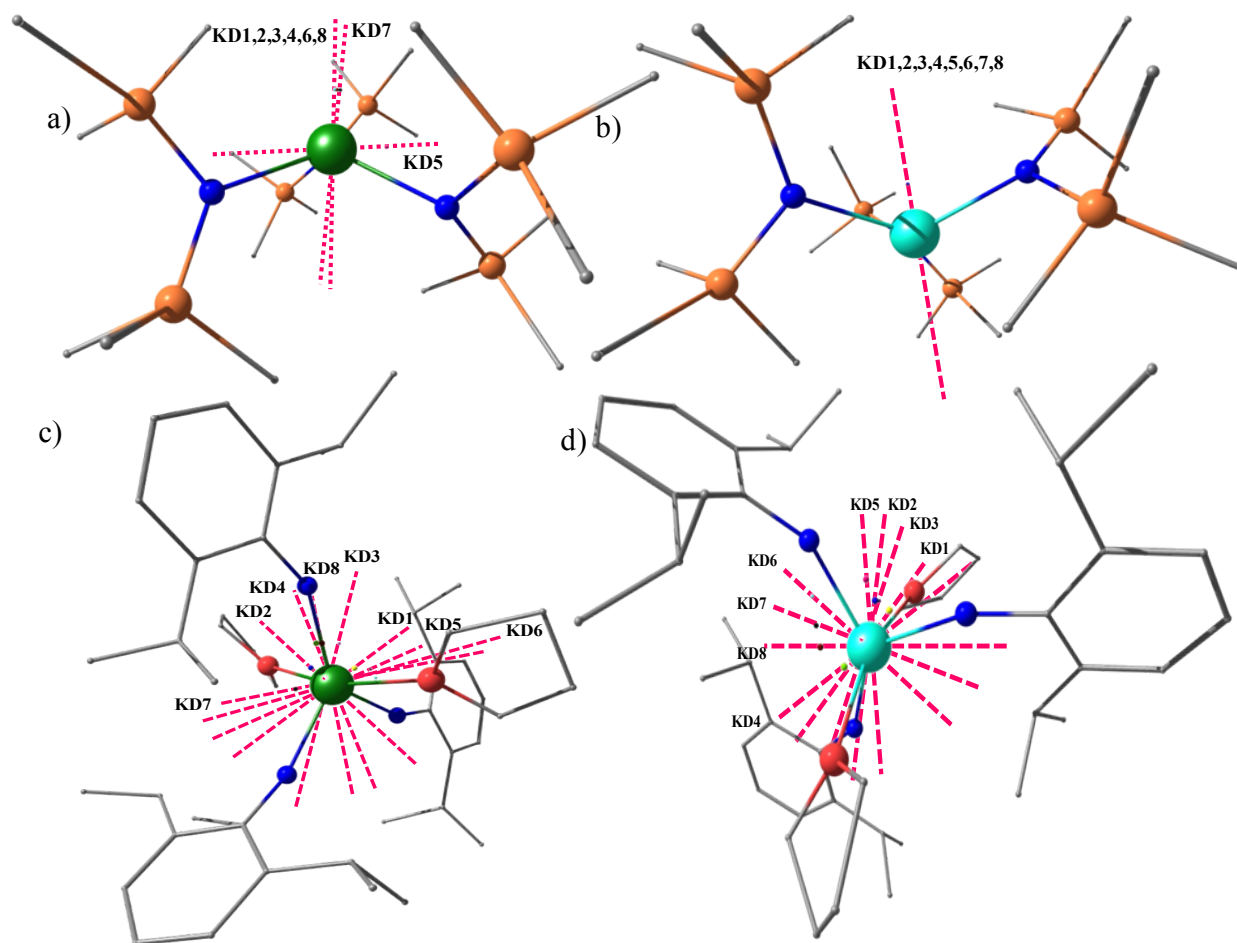

Figure S1. *Ab-initio* computed orientation of principal magnetization axes of the all the KDs for complexes a) **1a** b) **1b** c) **2a** and d) **2b** Color Code: green (Er), cyan (Dy), blue (N), red (O), orange (Si), grey for (C). The hydrogens are omitted for clarity.

## Supplementary Information

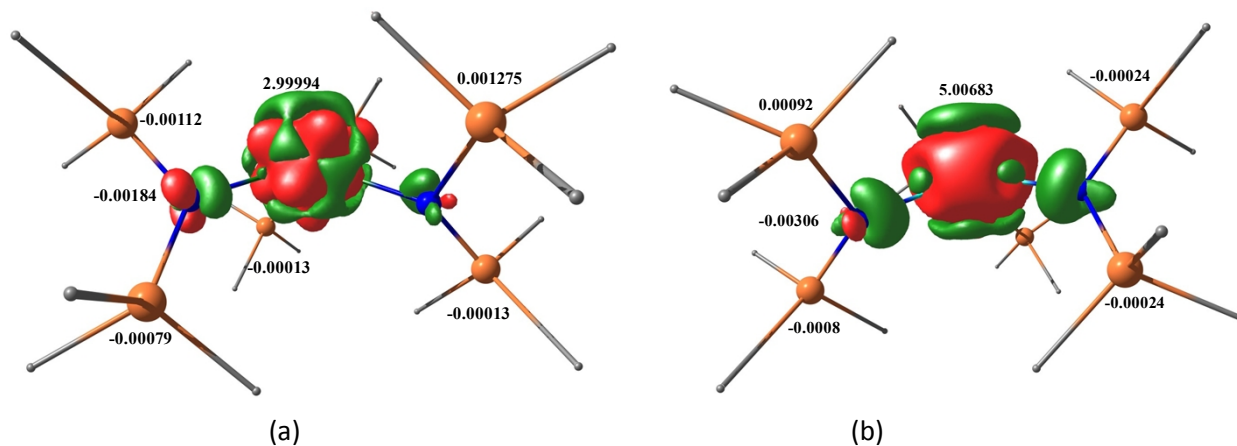

Figure S2. Spin Density plots of complex (a) **1a** and (b) **1b**. The isodensity surface represented here corresponds to value of  $0.005e^-/\text{bohr}^3$ . The red and green regions are the positive and negative spin density respectively.

Table S5. SINGLE\_ANISO computed g-tensors and relative energies of eight low lying Kramers doublets as well the orbital magnetic moment  $\langle L_z \rangle$  component associated with each KDs for complex **1a** along with the deviation from the principal magnetization axes of first KD. The sign of product of  $g_x \cdot g_y \cdot g_z$  also provide for each Kramers Doublet.

| <i>KDs</i><br><i>Energy(cm<sup>-1</sup>)</i> | <i>g<sub>xx</sub></i> | <i>g<sub>yy</sub></i> | <i>g<sub>zz</sub></i> | $\langle L_z \rangle$ | $\theta$ | <i>Sign of g<sub>x</sub>·g<sub>y</sub>·g<sub>z</sub></i> |
|----------------------------------------------|-----------------------|-----------------------|-----------------------|-----------------------|----------|----------------------------------------------------------|
| 0.000                                        | 0.00                  | 0.00                  | 17.88                 | 5.99                  | 0        | +                                                        |
| 101.38                                       | 0.13                  | 0.13                  | 15.48                 | 5.19                  | 0.074    | +                                                        |
| 180.10                                       | 0.06                  | 0.19                  | 12.82                 | 4.30                  | 0.490    | -                                                        |
| 266.35                                       | 0.08                  | 0.22                  | 9.92                  | 3.34                  | 0.335    | +                                                        |
| 331.06                                       | 5.75                  | 5.97                  | 6.30                  | 2.10                  | 79.57    | +                                                        |
| 439.92                                       | 6.12                  | 6.03                  | 3.51                  | 1.19                  | 1.294    | -                                                        |
| 500.34                                       | 0.21                  | 0.42                  | 3.97                  | 1.34                  | 4.469    | +                                                        |
| 539.27                                       | 9.74                  | 8.99                  | 1.05                  | 0.36                  | 0.705    | +                                                        |

## Supplementary Information

Table S6. SINGLE\_ANISO computed g-tensors and relative energies of eight low lying Kramers doublets as well the orbital magnetic moment  $\langle L_z \rangle$  component associated with each KDs for complex **1b** along with the deviation from the principal magnetization axes of first KD. The sign of product of  $g_x \cdot g_y \cdot g_z$  also provide for each Kramers Doublet.

| <i>KDs</i><br><i>Energy(cm<sup>-1</sup>)</i> | <i>g<sub>xx</sub></i> | <i>g<sub>yy</sub></i> | <i>g<sub>zz</sub></i> | <i>&lt;L<sub>z</sub>&gt;</i> | <i>θ</i> | <i>Sign of g<sub>x</sub>g<sub>y</sub>g<sub>z</sub></i> |
|----------------------------------------------|-----------------------|-----------------------|-----------------------|------------------------------|----------|--------------------------------------------------------|
| 0.000                                        | 10.98                 | 10.32                 | 1.38                  | 0.31                         | 0        | +                                                      |
| 48.45                                        | 0.10                  | 0.55                  | 4.19                  | 0.94                         | 0.693    | +                                                      |
| 147.43                                       | 1.29                  | 1.73                  | 6.82                  | 1.54                         | 0.379    | -                                                      |
| 304.56                                       | 1.48                  | 1.49                  | 9.54                  | 2.17                         | 0.274    | +                                                      |
| 519.20                                       | 0.00                  | 0.00                  | 12.26                 | 2.84                         | 0.151    | +                                                      |
| 789.58                                       | 0.01                  | 0.01                  | 14.78                 | 3.52                         | 0.125    | -                                                      |
| 1078.23                                      | 0.01                  | 0.01                  | 17.31                 | 4.24                         | 0.100    | +                                                      |
| 1337.28                                      | 0                     | 0                     | 19.87                 | 2.49                         | 0.090    | +                                                      |

Table S7. SINGLE\_ANISO computed g-tensors and relative energies of eight low lying Kramers doublets as well the orbital magnetic moment  $\langle L_z \rangle$  component associated with each KDs for complex **2a** along with the deviation from the principal magnetization axes of first KD. The sign of product of  $g_x \cdot g_y \cdot g_z$  also provide for each Kramers Doublet.

| <i>KDs</i><br><i>Energy(cm<sup>-1</sup>)</i> | <i>g<sub>xx</sub></i> | <i>g<sub>yy</sub></i> | <i>g<sub>zz</sub></i> | <i>&lt;L<sub>z</sub>&gt;</i> | <i>θ</i> | <i>Sign of g<sub>x</sub>g<sub>y</sub>g<sub>z</sub></i> |
|----------------------------------------------|-----------------------|-----------------------|-----------------------|------------------------------|----------|--------------------------------------------------------|
| 0.000                                        | 0.04                  | 0.64                  | 16.20                 | 5.43                         | 0        | +                                                      |
| 76.32                                        | 3.56                  | 5.49                  | 9.97                  | 3.33                         | 55.39    | +                                                      |
| 114.85                                       | 0.29                  | 3.08                  | 9.22                  | 3.06                         | 87.54    | +                                                      |
| 200.85                                       | 0.37                  | 2.45                  | 12.02                 | 4.01                         | 93.93    | +                                                      |
| 249.75                                       | 0.25                  | 4.54                  | 10.67                 | 3.57                         | 25.77    | -                                                      |
| 260.98                                       | 0.25                  | 3.53                  | 11.42                 | 3.83                         | 35.87    | -                                                      |
| 318.08                                       | 0.02                  | 0.68                  | 15.61                 | 5.24                         | 84.54    | -                                                      |
| 372.56                                       | 0.09                  | 0.17                  | 16.82                 | 5.64                         | 94.93    | -                                                      |

## Supplementary Information

Table S8. SINGLE\_ANISO computed g-tensors and relative energies of eight low lying Kramers doublets as well the orbital magnetic moment  $\langle L_z \rangle$  component associated with each KDs for complex **2b** along with the deviation from the principal magnetization axes of first KD. The sign of product of  $g_x \cdot g_y \cdot g_z$  also provide for each Kramers Doublet.

| <i>KDs</i><br><i>Energy(cm<sup>-1</sup>)</i> | <i>g<sub>xx</sub></i> | <i>g<sub>yy</sub></i> | <i>g<sub>zz</sub></i> | <i>&lt;L<sub>z</sub>&gt;</i> | <i>θ</i> | <i>Sign of g<sub>x</sub>g<sub>y</sub>g<sub>z</sub></i> |
|----------------------------------------------|-----------------------|-----------------------|-----------------------|------------------------------|----------|--------------------------------------------------------|
| 0.000                                        | 0.00                  | 0.01                  | 19.67                 | 4.90                         | 0        | +                                                      |
| 199.26                                       | 0.06                  | 0.07                  | 17.15                 | 4.35                         | 18.67    | +                                                      |
| 377.73                                       | 0.29                  | 0.44                  | 14.68                 | 3.78                         | 7.03     | +                                                      |
| 409.49                                       | 0.67                  | 0.88                  | 19.21                 | 4.78                         | 74.10    | +                                                      |
| 464.09                                       | 55.1                  | 6.65                  | 9.14                  | 2.29                         | 48.52    | +                                                      |
| 525.76                                       | 0.92                  | 1.34                  | 13.32                 | 3.29                         | 72.78    | +                                                      |
| 580.88                                       | 0.47                  | 0.92                  | 16.88                 | 4.17                         | 50.89    | +                                                      |
| 790.92                                       | 0                     | 0                     | 19.89                 | 4.95                         | 74.04    | +                                                      |

## Supplementary Information

Table S9. SINGLE\_ANISO computed crystal field parameters for complex **1a**. The major components in the Table are in the bold font. The crystal field Hamiltonian parameter:

$$\hat{H}_{CF} = \sum_{k=-q}^q \sum_{q} B_q^k O_q^k$$

Where  $B_q^k$  the crystal is field parameter and  $O_q^k$  is the extended Stevens operator. Quantization axis is chosen to be the main magnetic axes of the ground Kramer Doublet.

| k | q  | $B_q^k$                     | $B_q^k$                            | $B_q^k$                     | $B_q^k$                            |
|---|----|-----------------------------|------------------------------------|-----------------------------|------------------------------------|
|   |    | Complex <b>1a</b>           | Complex <b>1b</b>                  | Complex <b>2a</b>           | Complex <b>2b</b>                  |
| 2 | -2 | 0.02587                     | -0.0042                            | -1.02196                    | -2.20342                           |
|   | -1 | 0.05178                     | -0.06762                           | 0.4811                      | 2.70427                            |
|   | 0  | <b>-2.99629</b>             | <b>8.09015</b>                     | <b>-0.9781</b>              | <b>-3.22959</b>                    |
|   | 1  | 0.02321                     | 0.02452                            | 0.02451                     | <b>-0.5064</b>                     |
|   | 2  | -0.02654                    | -0.01981                           | 0.56444                     | -0.23786                           |
| 4 | -4 | -8.84486 x 10 <sup>-5</sup> | -1.54525x 10 <sup>-4</sup>         | -0.00581                    | -0.00565                           |
|   | -3 | -0.03937                    | 0.01748                            | -0.00487                    | -0.00827                           |
|   | -2 | 1.21293 x 10 <sup>-4</sup>  | 3.23672 x 10 <sup>-4</sup>         | -0.00969                    | 0.01433                            |
|   | -1 | -2.24696 x 10 <sup>-4</sup> | 1.72702 x 10 <sup>-4</sup>         | 0.00978                     | -0.01681                           |
|   | 0  | 0.00129                     | <b>-0.00237</b>                    | <b>-0.00147</b>             | <b>-0.00347</b>                    |
|   | 1  | -6.88823 x 10 <sup>-5</sup> | -4.50248 x 10 <sup>-5</sup>        | 0.00883                     | <b>0.00638</b>                     |
|   | 2  | -2.8973 x 10 <sup>-4</sup>  | -3.46259 x 10 <sup>-5</sup>        | -3.92465 x 10 <sup>-4</sup> | 0.02529                            |
|   | 3  | <b>-0.05335</b>             | -0.10277                           | 0.04704                     | <b>0.01232</b>                     |
|   | 4  | 2.56318 x 10 <sup>-4</sup>  | -2.36646 x 10 <sup>-5</sup>        | -0.02183                    | -0.02371                           |
| 6 | -6 | 1.74789 x 10 <sup>-4</sup>  | 1.08415 x 10 <sup>-4</sup>         | -1.65756 x 10 <sup>-4</sup> | 1.24124 x 10 <sup>-4</sup>         |
|   | -5 | 1.36916 x 10 <sup>-5</sup>  | -3.98333 x 10 <sup>-6</sup>        | <b>0.00183</b>              | -1.99833 x 10 <sup>-4</sup>        |
|   | -4 | -1.57799 x 10 <sup>-5</sup> | 8.55487 x 10 <sup>-6</sup>         | -1.18506 x 10 <sup>-5</sup> | 1.92202 x 10 <sup>-5</sup>         |
|   | -3 | 2.17809 x 10 <sup>-4</sup>  | 1.78278 x 10 <sup>-4</sup>         | -1.20382 x 10 <sup>-4</sup> | -1.86489 x 10 <sup>-4</sup>        |
|   | -2 | -4.70489 x 10 <sup>-6</sup> | 8.17853 x 10 <sup>-6</sup>         | -2.30679 x 10 <sup>-4</sup> | -3.42703 x 10 <sup>-5</sup>        |
|   | -1 | 1.21298 x 10 <sup>-6</sup>  | 4.83423 x 10 <sup>-6</sup>         | -1.61431 x 10 <sup>-4</sup> | -1.72086 x 10 <sup>-4</sup>        |
|   | 0  | -1.12061 x 10 <sup>-6</sup> | <b>-1.08768</b> x 10 <sup>-5</sup> | -3.27297 x 10 <sup>-5</sup> | -4.30435 x 10 <sup>-6</sup>        |
|   | 1  | 3.97149 x 10 <sup>-7</sup>  | -1.69904 x 10 <sup>-6</sup>        | -2.12929 x 10 <sup>-4</sup> | <b>-6.40945</b> x 10 <sup>-5</sup> |
|   | 2  | 7.64881 x 10 <sup>-6</sup>  | -2.72775 x 10 <sup>-6</sup>        | 4.1438 x 10 <sup>-5</sup>   | 1.11622 x 10 <sup>-4</sup>         |
|   | 3  | 4.62887 x 10 <sup>-4</sup>  | -4.3029 x 10 <sup>-4</sup>         | 8.71018 x 10 <sup>-5</sup>  | -8.11151 x 10 <sup>-5</sup>        |
|   | 4  | 8.74372 x 10 <sup>-6</sup>  | 4.43644 x 10 <sup>-6</sup>         | 1.49989 x 10 <sup>-4</sup>  | -6.06147 x 10 <sup>-5</sup>        |
|   | 5  | -1.01248 x 10 <sup>-7</sup> | 2.80239 x 10 <sup>-6</sup>         | 5.04382 x 10 <sup>-4</sup>  | <b>3.36976</b> x 10 <sup>-4</sup>  |
|   | 6  | -2.45059 x 10 <sup>-4</sup> | 6.3186 x 10 <sup>-5</sup>          | 7.53159 x 10 <sup>-5</sup>  | 8.18858 x 10 <sup>-5</sup>         |

## Supplementary Information

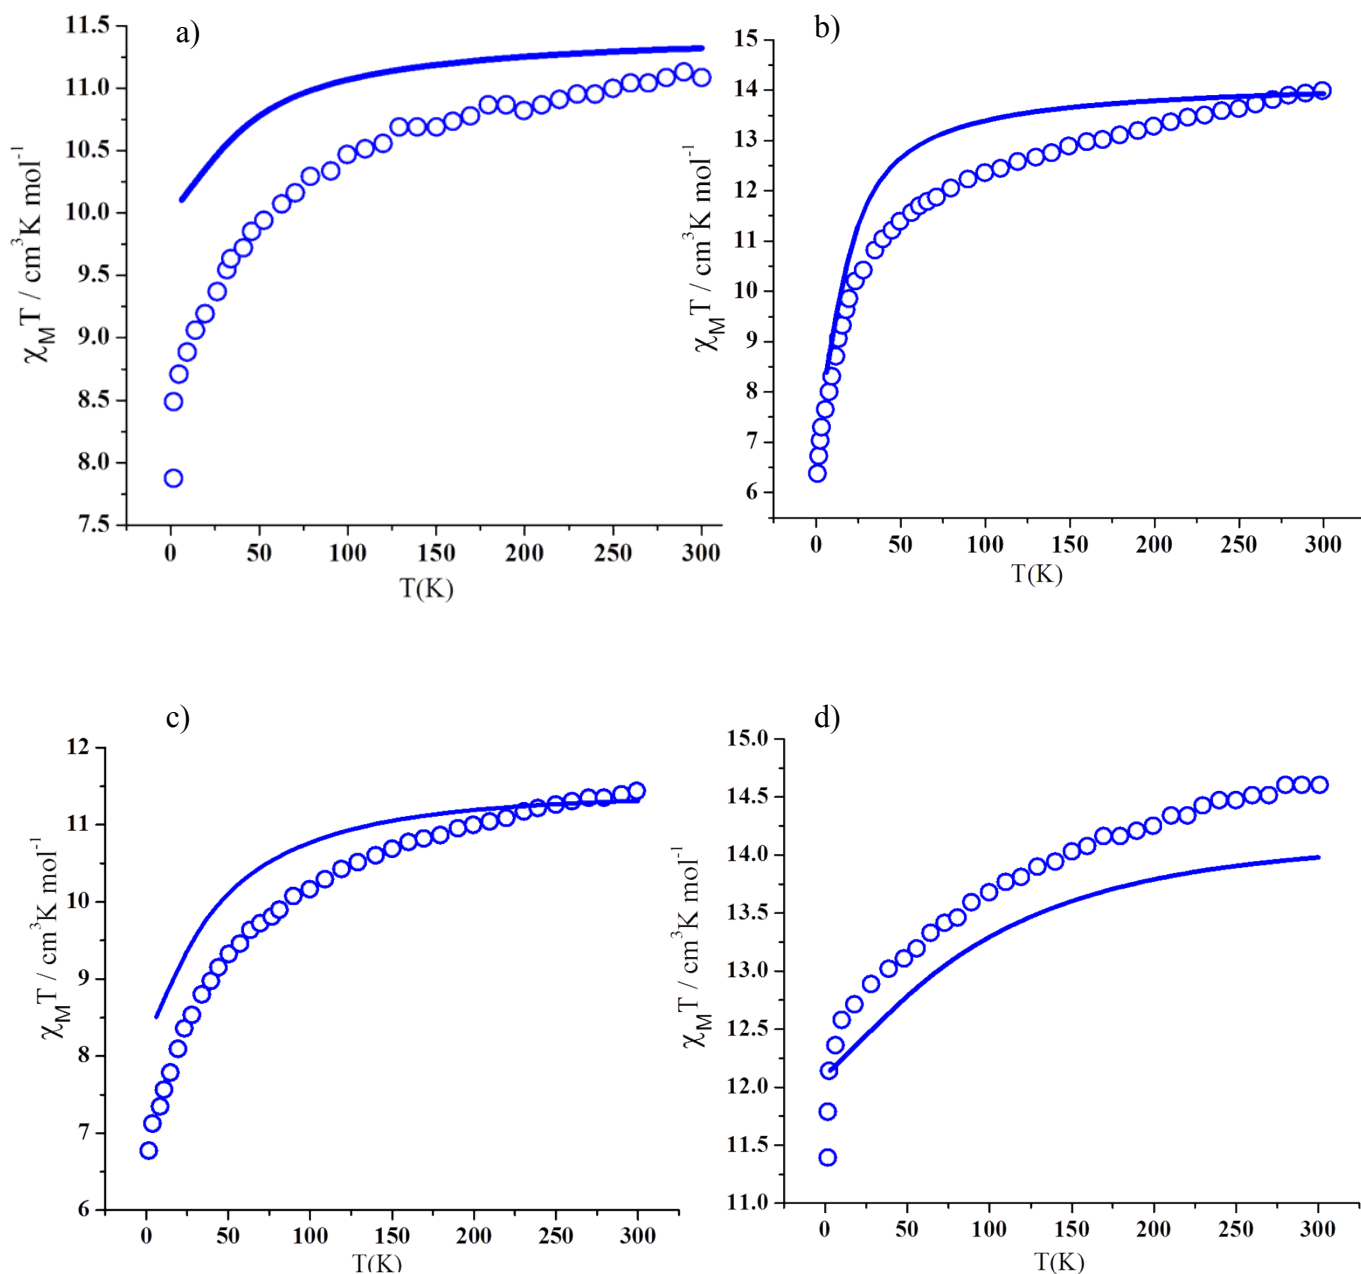

Figure S3. Experimental and *ab initio* computed molar magnetic susceptibility plots for complexes a) **1a**, b) **1b**, c) **2a** and d) **2b**. The blue hollow circles, in all four plots are the experimental magnetic susceptibility extracted from the experimental plots.<sup>14-18</sup> The solid blue lines are the *ab initio* computed molar magnetic susceptibilities. Note the intermolecular interactions  $zJ$  is taken as zero in these calculations.

## Supplementary Information

### Out of Plane Shift

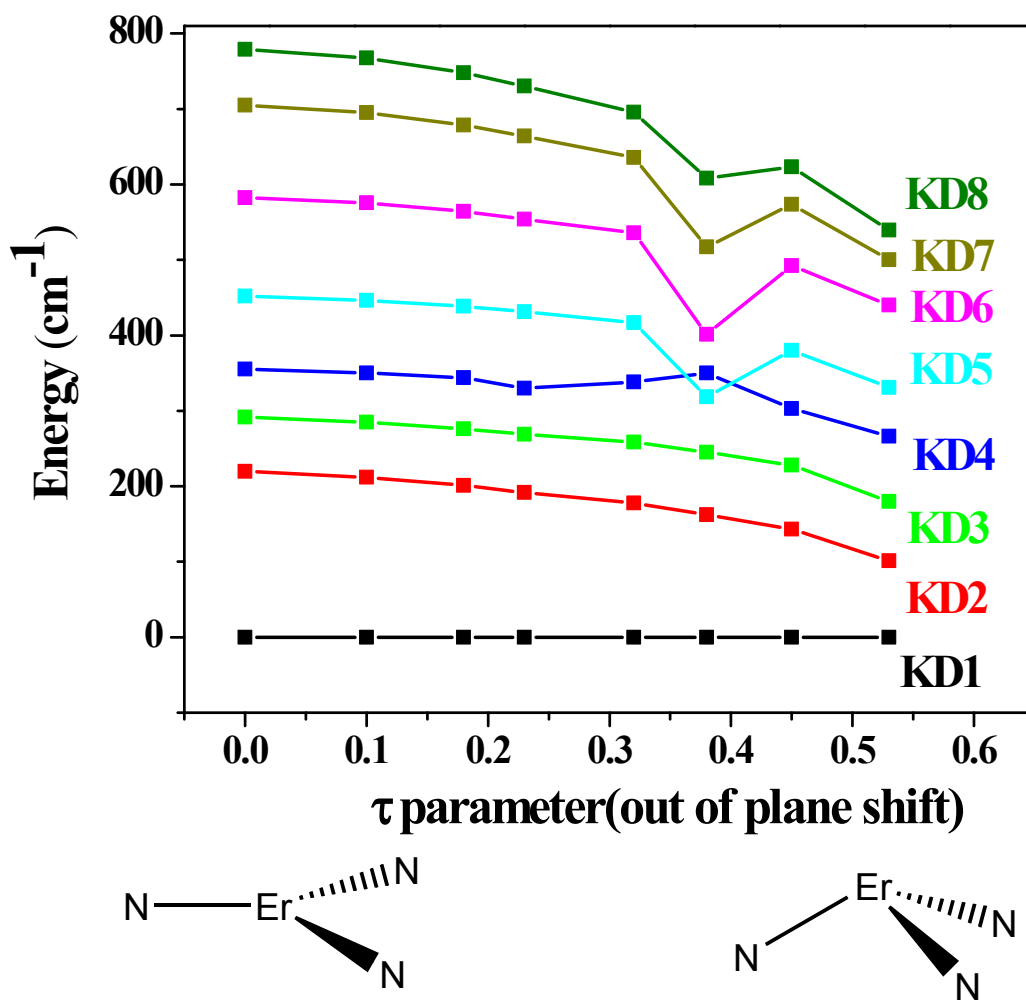

Figure S4. The *ab initio* computed energy levels as a function of out of plane shift parameter ( $\tau$ ). All the points have been generated from the CASSCF+RASSI calculations on each structure.

## Supplementary Information

Table S10. SINGLE\_ANISO computed g-tensors and relative energies of eight low lying Kramers doublets as well the orbital magnetic moment  $\langle L_z \rangle$  component associated with each KDs varying out of plane shift parameter ( $\tau$ ) in complex **1a**.

| <i>KDs</i><br><i>Energy(cm<sup>-1</sup>)</i> | <i>g<sub>xx</sub></i> | <i>g<sub>yy</sub></i> | <i>g<sub>zz</sub></i><br>$\tau$ - <b>0.0</b> | $\theta$ |
|----------------------------------------------|-----------------------|-----------------------|----------------------------------------------|----------|
| 0.000                                        | 0                     | 0                     | 17.86                                        | 0        |
| 219.50                                       | 0.03                  | 0.03                  | 15.48                                        | 0.07     |
| 291.82                                       | 0.02                  | 0.03                  | 13.05                                        | 0.03     |
| 355.14                                       | 0.01                  | 0.02                  | 10.61                                        | 0.16     |
| 452.18                                       | 1.31                  | 1.34                  | 8.07                                         | 0.04     |
| 582.39                                       | 1.10                  | 1.61                  | 5.70                                         | 0.08     |
| 704.92                                       | 0.11                  | 0.35                  | 3.62                                         | 1.27     |
| 779.04                                       | 9.64                  | 9.38                  | 1.15                                         | 0.02     |



## Supplementary Information

| <i>KDs</i><br><i>Energy(cm<sup>-1</sup>)</i> | <i>g<sub>xx</sub></i> | <i>g<sub>yy</sub></i> | <i>g<sub>zz</sub></i> | <i>θ</i> | <i>KDs</i><br><i>Energy(cm<sup>-1</sup>)</i> | <i>g<sub>xx</sub></i> | <i>g<sub>yy</sub></i> | <i>g<sub>zz</sub></i> | <i>θ</i> |
|----------------------------------------------|-----------------------|-----------------------|-----------------------|----------|----------------------------------------------|-----------------------|-----------------------|-----------------------|----------|
|                                              | <b>τ- 0.1</b>         |                       |                       |          |                                              | <b>τ- 0.18</b>        |                       |                       |          |
| 0.000                                        | 0                     | 0                     | 17.86                 | 0        | 0.000                                        | 0                     | 0                     | 17.86                 | 0        |
| 211.73                                       | 0.03                  | 0.03                  | 15.48                 | 0.05     | 200.98                                       | 0.04                  | 0.04                  | 15.48                 | 0.05     |
| 284.82                                       | 0.03                  | 0.03                  | 13.05                 | 0.03     | 276.29                                       | 0.03                  | 0.04                  | 13.03                 | 0.1      |
| 349.90                                       | 0.02                  | 0.02                  | 10.6                  | 0.01     | 343.84                                       | 0.03                  | 0.03                  | 10.57                 | 0.08     |
| 446.43                                       | 1.58                  | 1.61                  | 8.01                  | 0.08     | 438.48                                       | 1.93                  | 1.99                  | 7.92                  | 0.16     |
| 575.40                                       | 1.61                  | 1.65                  | 5.65                  | 0.05     | 564.09                                       | 1.96                  | 2.02                  | 5.57                  | 0.17     |
| 695.29                                       | 0.19                  | 0.22                  | 3.63                  | 0.59     | 678.69                                       | 0.18                  | 0.22                  | 3.65                  | 1.29     |
| 767.78                                       | 9.70                  | 9.32                  | 1.15                  | 0.09     | 747.85                                       | 9.70                  | 9.31                  | 1.15                  | 0.17     |

| <i>KDs</i><br><i>Energy(cm<sup>-1</sup>)</i> | <i>g<sub>xx</sub></i> | <i>g<sub>yy</sub></i> | <i>g<sub>zz</sub></i> | <i>θ</i> | <i>KDs</i><br><i>Energy(cm<sup>-1</sup>)</i> | <i>g<sub>xx</sub></i> | <i>g<sub>yy</sub></i> | <i>g<sub>zz</sub></i> | <i>θ</i> |
|----------------------------------------------|-----------------------|-----------------------|-----------------------|----------|----------------------------------------------|-----------------------|-----------------------|-----------------------|----------|
|                                              | <b>τ- 0.23</b>        |                       |                       |          |                                              | <b>τ- 0.32</b>        |                       |                       |          |
| 0.000                                        | 0.0000                | 0.0000                | 17.86                 | 0        | 0.000                                        | 0.0000                | 0.0000                | 17.86                 | 0        |
| 191.73                                       | 0.05                  | 0.07\5                | 15.48                 | 0.09     | 177.90                                       | 0.07                  | 0.07                  | 15.49                 | 0.07     |
| 268.82                                       | 0.04                  | 0.05                  | 13.02                 | 0.11     | 258.65                                       | 0.06                  | 0.08                  | 12.98                 | 0.19     |
| 338.32                                       | 0.03                  | 0.04                  | 10.53                 | 0.09     | 330.14                                       | 0.02                  | 0.03                  | 10.44                 | 0.04     |
| 431.20                                       | 2.26                  | 2.32                  | 7.83                  | 0.20     | 416.98                                       | 3.30                  | 3.35                  | 7.49                  | 0.23     |
| 554.11                                       | 2.28                  | 2.35                  | 5.49                  | 0.26     | 535.77                                       | 3.29                  | 3.39                  | 5.17                  | 0.57     |
| 664.18                                       | 0.19                  | 0.24                  | 3.66                  | 1.49     | 635.42                                       | 0.26                  | 0.32                  | 3.70                  | 2.25     |
| 730.53                                       | 9.70                  | 9.29                  | 1.14                  | 0.21     | 695.83                                       | 9.77                  | 9.19                  | 1.13                  | 0.24     |

## Supplementary Information

| <i>KDs</i><br><i>Energy(cm<sup>-1</sup>)</i> | <i>g<sub>xx</sub></i> | <i>g<sub>yy</sub></i> | <i>g<sub>zz</sub></i> | <i>θ</i> | <i>KDs</i><br><i>Energy(cm<sup>-1</sup>)</i> | <i>g<sub>xx</sub></i> | <i>g<sub>yy</sub></i> | <i>g<sub>zz</sub></i> | <i>θ</i> |
|----------------------------------------------|-----------------------|-----------------------|-----------------------|----------|----------------------------------------------|-----------------------|-----------------------|-----------------------|----------|
| <b>τ- 0.38</b>                               |                       |                       |                       |          | <b>τ- 0.45</b>                               |                       |                       |                       |          |
| 0.000                                        | 0                     | 0                     | 17.86                 | 0        | 0.000                                        | 0                     | 0                     | 17.87                 | 0        |
| 162.37                                       | 0.08                  | 0.08                  | 15.49                 | 0.01     | 143.21                                       | 0.1                   | 0.1                   | 15.49                 | 0.12     |
| 245.20                                       | 0.08                  | 0.09                  | 12.95                 | 0.16     | 228.09                                       | 0.08                  | 0.11                  | 12.91                 | 0.29     |
| 349.90                                       | 0.03                  | 0.04                  | 10.36                 | 0.07     | 303.19                                       | 0.04                  | 0.08                  | 10.24                 | 0.13     |
| 318.66                                       | 3.91                  | 3.97                  | 7.21                  | 0.08     | 380.22                                       | 4.63                  | 4.75                  | 6.80                  | 1.35     |
| 401.40                                       | 3.89                  | 4.00                  | 4.91                  | 1.12     | 492.40                                       | 4.51                  | 4.52                  | 4.86                  | 88.13    |
| 516.94                                       | 0.25                  | 0.34                  | 3.73                  | 2.49     | 573.57                                       | 0.05                  | 0.24                  | 3.79                  | 2.1      |
| 608.38                                       | 9.76                  | 9.16                  | 1.12                  | 0.28     | 623.45                                       | 9.55                  | 9.32                  | 1.10                  | 0.25     |

| <i>KDs</i><br><i>Energy(cm<sup>-1</sup>)</i> | <i>g<sub>xx</sub></i> | <i>g<sub>yy</sub></i> | <i>g<sub>zz</sub></i> | <i>θ</i> |
|----------------------------------------------|-----------------------|-----------------------|-----------------------|----------|
| <b>τ- 0.53</b>                               |                       |                       |                       |          |
| 0.000                                        | 0.00                  | 0.00                  | 17.88                 | 0        |
| 101.38                                       | 0.13                  | 0.13                  | 15.48                 | 0.074    |
| 180.10                                       | 0.06                  | 0.19                  | 12.82                 | 0.490    |
| 266.35                                       | 0.08                  | 0.22                  | 9.92                  | 0.335    |
| 331.06                                       | 5.75                  | 5.97                  | 6.30                  | 79.57    |
| 439.92                                       | 6.12                  | 6.03                  | 3.51                  | 1.294    |
| 500.34                                       | 0.21                  | 0.42                  | 3.97                  | 4.469    |
| 779.04                                       | 9.64                  | 9.38                  | 1.15                  | 0.705    |

## Supplementary Information

Table S11. CASSCF+RASSI computed spin-free energies and spin-orbit state energies for complex **1b**. The SO states energies obtained here by mixing 21 sextets+108 quartets+32 doublets which falls under 40,000  $\text{cm}^{-1}$  of energy range.



## Supplementary Information

|           |           |           |           |           |           |
|-----------|-----------|-----------|-----------|-----------|-----------|
| 25527.821 | 31426.514 | 38964.168 | 15111.961 | 29288.896 | 34878.916 |
|-----------|-----------|-----------|-----------|-----------|-----------|

Table S13. SINGLE\_ANISO computed g-tensors and relative energies of eight low lying Kramers doublets obtained by calculating 21 sextets+108 quartets+32 doublets for complex **1b**.

| <i>KDs</i><br><i>Energy(cm<sup>-1</sup>)</i> | <i>g<sub>xx</sub></i> | <i>g<sub>yy</sub></i> | <i>g<sub>zz</sub></i> |
|----------------------------------------------|-----------------------|-----------------------|-----------------------|
| 0                                            | 10.919                | 10.283                | 1.371                 |
| 48.993                                       | 0.101                 | 0.529                 | 4.150                 |
| 148.96                                       | 1.200                 | 1.623                 | 6.761                 |
| 306.535                                      | 1.389                 | 1.398                 | 9.458                 |
| 520.516                                      | 0.004                 | 0.006                 | 12.159                |
| 787.184                                      | 0.006                 | 0.008                 | 14.678                |
| 1071.428                                     | 0.008                 | 0.009                 | 17.218                |
| 1329.144                                     | 0.000                 | 0.000                 | 19.792                |

Table S13. SINGLE\_ANISO computed g-tensors and relative energies of eight low lying Kramers doublets obtained by calculating 21 sextets+108 quartets+32 doublets for complex **2b**.

| <i>KDs</i><br><i>Energy(cm<sup>-1</sup>)</i> | <i>g<sub>xx</sub></i> | <i>g<sub>yy</sub></i> | <i>g<sub>zz</sub></i> |
|----------------------------------------------|-----------------------|-----------------------|-----------------------|
| 0                                            | 0.007                 | 0.012                 | 19.591                |
| 197.622                                      | 0.059                 | 0.068                 | 17.089                |
| 372.556                                      | 0.272                 | 0.425                 | 14.659                |
| 405.172                                      | 0.736                 | 0.951                 | 19.014                |
| 458.406                                      | 0.575                 | 6.651                 | 8.900                 |
| 519.054                                      | 0.940                 | 1.319                 | 13.360                |
| 575.819                                      | 0.425                 | 0.841                 | 16.785                |
| 782.052                                      | 0.004                 | 0.006                 | 19.798                |

### References:

1. F. Aquilante, L. De Vico, N. Ferre, G. Ghigo, P. A. Malmqvist, P. Neogady, T. B. Pedersen, M. Pitonak, M. Reiher, B. O. Roos, L. Serrano-Andres, M. Urban, V. Veryazov and R. Lindh, *J. Comput. Chem.*, 2010, **31**, 224-247.
2. J. A. Duncan, *J. Am. Chem. Soc.*, 2009, **131**, 2416-2416.

## Supplementary Information

3. G. Karlstrom, R. Lindh, P. A. Malmqvist, B. O. Roos, U. Ryde, V. Veryazov, P. O. Widmark, M. Cossi, B. Schimmelpfennig, P. Neogrady and L. Seijo, *Comput. Mater. Sci.*, 2003, **28**, 222-239.
4. B. O. Roos, R. Lindh, P. A. Malmqvist, V. Veryazov, P. O. Widmark and A. C. Borin, *J. Phys. Chem.A*, 2008, **112**, 11431-11435.
5. P. A. Malmqvist, B. O. Roos and B. Schimmelpfennig, *Chem.Phys. Lett.*, 2002, **357**, 230-240.
6. K. Bernot, J. Luzon, L. Bogani, M. Etienne, C. Sangregorio, M. Shanmugam, A. Caneschi, R. Sessoli and D. Gatteschi, *J. Am. Chem. Soc.*, 2009, **131**, 5573-5579.
7. R. D. Gaussian 09, M. J. Frisch, G. W. Trucks, H. B. Schlegel, G. E. Scuseria, M. A. Robb, J. R. Cheeseman, G. Scalmani, V. Barone, B. Mennucci, G. A. Petersson, H. Nakatsuji, M. Caricato, X. Li, H. P. Hratchian, A. F. Izmaylov, J. Bloino, G. Zheng, J. L. Sonnenberg, M. Hada, M. Ehara, K. Toyota, R. Fukuda, J. Hasegawa, M. Ishida, T. Nakajima, Y. Honda, O. Kitao, H. Nakai, T. Vreven, J. A. Montgomery, Jr., J. E. Peralta, F. Ogliaro, M. Bearpark, J. J. Heyd, E. Brothers, K. N. Kudin, V. N. Staroverov, R. Kobayashi, J. Normand, K. Raghavachari, A. Rendell, J. C. Burant, S. S. Iyengar, J. Tomasi, M. Cossi, N. Rega, J. M. Millam, M. Klene, J. E. Knox, J. B. Cross, V. Bakken, C. Adamo, J. Jaramillo, R. Gomperts, R. E. Stratmann, O. Yazyev, A. J. Austin, R. Cammi, C. Pomelli, J. W. Ochterski, R. L. Martin, K. Morokuma, V. G. Zakrzewski, G. A. Voth, P. Salvador, J. J. Dannenberg, S. Dapprich, A. D. Daniels, Ö. Farkas, J. B. Foresman, J. V. Ortiz, J. Cioslowski, and D. J. Fox, Gaussian, Inc., Wallingford CT, 2009.
8. P. J. Stephens, F. J. Devlin, C. F. Chabalowski and M. J. Frisch, *J. Phys. Chem.US*, 1994, **98**, 11623-11627.
9. A. D. Becke, *J.Chem.Phys.*, 1993, **98**, 5648-5652.
10. C. T. Lee, W. T. Yang and R. G. Parr, *Phys. Rev. B*, 1988, **37**, 785-789.
11. A. D. Becke, *Phys. Rev. A*, 1988, **38**, 3098-3100.
12. T. R. Cundari and W. J. Stevens, *J.Chem.Phys.*, 1993, **98**, 5555-5565.
13. A. Schafer, C. Huber and R. Ahlrichs, *J.Chem.Phys.*, 1994, **100**, 5829-5835.
14. P. Zhang, L. Zhang, C. Wang, S. Xue, S.-Y. Lin and J. Tang, *J. Am. Chem. Soc.*, 2014, **136**, 4484-4487.
15. W. J. Evans, M. A. Ansari, J. W. Ziller and S. I. Khan, *Inorg. Chem.*, 1996, **35**, 5435-5444.
16. D. C. Bradley, J. S. Ghotra and F. A. Hart, *J. Chem. Soc., Chem. Commun.*, 1972, 349-350.
17. S. Jank, H. D. Amberger and N. M. Edelstein, *Spectrochim. Acta, Part A*, 1998, **54**, 1645-1650.
18. S. Jank, H. Reddmann and H. D. Amberger, *Inorg. Chim. Acta*, 2008, **361**, 2154-2158.
